# Supplementary material
Source: PubMed Central journal article supplement (PMC5529311)
Supplement: mmc7.pdf [file mmc7.pdf]

# Biphasic Effect of Profilin Impacts the Formin mDia1 Force-Sensing Mechanism in Actin Polymerization

Hiroaki Kubota,<sup>1</sup> Makito Miyazaki,<sup>1,2,\*</sup> Taisaku Ogawa,<sup>1</sup> Togo Shimozaawa,<sup>3</sup> Kazuhiko Kinoshita, Jr.,<sup>1</sup> and Shin'ichi Ishiwata<sup>1,\*</sup>

<sup>1</sup>Department of Physics, Faculty of Science and Engineering, Waseda University, Shinjuku-ku, Tokyo, Japan; <sup>2</sup>Waseda Bioscience Research Institute in Singapore (WABIOS), Singapore, Singapore; and <sup>3</sup>Department of Life Science and Medical Bioscience, Faculty of Science and Engineering, Waseda University, Shinjuku-ku, Tokyo, Japan

**ABSTRACT** Formins are force-sensing proteins that regulate actin polymerization dynamics. Here, we applied stretching tension to individual actin filaments under the regulation of formin mDia1 to investigate the mechanical responses in actin polymerization dynamics. We found that the elongation of an actin filament was accelerated to a greater degree by stretching tension for ADP-G-actin than that for ATP-G-actin. An apparent decrease in the critical concentration of G-actin was observed, especially in ADP-G-actin. These results on two types of G-actin were reproduced by a simple kinetic model, assuming the rapid equilibrium between pre- and posttranslocated states of the formin homology domain two dimer. In addition, profilin concentration dramatically altered the force-dependent acceleration of actin filament elongation, which ranged from twofold to an all-or-none response. Even under conditions in which actin depolymerization occurred, applications of a several-piconewton stretching tension triggered rapid actin filament elongation. This extremely high force-sensing mechanism of mDia1 and profilin could be explained by the force-dependent coordination of the biphasic effect of profilin; i.e., an acceleration effect masked by a depolymerization effect became dominant under stretching tension, negating the latter to rapidly enhance the elongation rate. Our findings demonstrate that the biphasic effect of profilin is controlled by mechanical force, thus expanding the function of mDia1 as a mechanosensitive regulator of actin polymerization.

## INTRODUCTION

Actin cytoskeleton morphological changes are based on actin filament assembly and disassembly dynamics. These dynamic changes are often force dependent and mediated by several mechanosensitive elements that transduce mechanical force into actin cytoskeleton remodeling (1–3). Talin and vinculin can construct mechanosensitive machinery that enhances actin filament accumulation on focal adhesions as a result of mechanical response (1). The cadherin-catenin complex collects actin filaments at adherens junctions via a force-dependent binding affinity (3). The actin-severing protein cofilin does not itself constitute a mechanosensitive element but mediates force-dependent actin

disassembly. Cofilin senses the conformational change of actin filaments induced by stretching tension (4) and immediately begins severing these after the applied tension is released (2).

Formin family proteins (formins) are also thought to be mechanosensitive regulators of actin polymerization dynamics (5). Formins are bound to the polymerizing (barbed-) end of actin filaments and remain attached with a “processive capping” capability (6). External pulling force on individual actin filaments transmitted as stretching tension to the formin-bound barbed end should thus modify the actin filament polymerization dynamics. The effects of stretching tension have been experimentally confirmed *in vitro* (7,8); however, several questions remain. The actin polymerization rate at the formin-bound barbed end is strongly affected by another actin binding protein, profilin (9,10). It was reported that the elongation rates on both yeast formin Bni1p and mammalian formin mDia1 were accelerated up to twofold by several-piconewton stretching tension in the presence of profilin (7,8). Conversely, Courtemanche et al. (7) reported that in the absence of profilin, stretching tension inhibited Bni1p-mediated actin filament elongation,

Submitted February 6, 2017, and accepted for publication June 9, 2017.

\*Correspondence: makito.miyazaki@aoni.waseda.jp or ishiwata@waseda.jp

Hiroaki Kubota's present address is Department of Microbiology, Tokyo Metropolitan Institute of Public Health, Shinjuku-ku, Tokyo, Japan.

Taisaku Ogawa's present address is Laboratory for Integrative Omics, RIKEN Quantitative Biology Center (QBiC), Suita, Osaka, Japan.

Deceased author: Kazuhiko Kinoshita Jr.

Editor: Laurent Blanchoin.

<http://dx.doi.org/10.1016/j.bpj.2017.06.012>

© 2017 Biophysical Society.

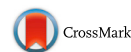

whereas Jégou et al. (8) did not show any experimental data under this condition. Accordingly, it remains unclear whether the inhibitory effect of stretching tension in the absence of profilin is common among formin family proteins. Furthermore, the previous models explaining the force-sensing mechanism were constructed without considering the effects of profilin (5,8).

Here, to investigate the effects of profilin on mDia1-mediated actin polymerization, we analyzed the mechanical response of the actin polymerization dynamics of individual filaments as regulated by formin mDia1, focusing on profilin concentration. Furthermore, we examined actin polymerization by mDia1, using ADP-G-actin, because most prior experiments regarding the mechanical response of formins utilized ATP-G-actin (7,8).

## MATERIALS AND METHODS

### Protein preparations

A nucleotide sequence encoding the 650-aa mammalian homolog of diaphanous-1 (mDia1), including FH1 and FH2 (residues 543–1192), was expressed using a bacterial cell system, as an N-terminally GST-tagged fusion protein and purified. The truncated mDia1 (650 aa), previously designated as “mDia1 $\Delta$ N3” (6,11), was here termed “mDia1”. Profilin I was expressed by the bacterial cell system and purified using poly-L-proline sepharose (12,13). G-actin was purified from acetone powder prepared from rabbit skeletal muscle (14). Further details of protein preparations are provided in the [Supporting Materials and Methods](#).

### Microscopy

We used an inverted microscope (IX71; Olympus, Tokyo, Japan) equipped with dual-trap-optical tweezers and capable of simultaneous phase contrast and fluorescent image examination, as we reported previously (4,15). Green (532 nm) and red (633 nm) lasers were used for excitation. Phase contrast and fluorescent images monitored in real time were used for actin dumbbell construction.

In this study, a microscope port was also connected to a high-speed digital camera (model No. BOBCAT ICL-B0620M; Imperx, Boca Raton, FL). After actin dumbbell construction, the phase contrast images of beads were projected to the high-speed camera and recorded on a computer, using the software LabVIEW (National Instruments, Austin, TX) via a CameraLink PCI Express card (model No. NI PCIe-1427; National Instruments). Size within microscopic images was determined by an objective micrometer (10  $\mu$ m, Olympus). Optical tweezer stiffness was determined by displacement of a bead from a trap center against the viscous drag of water, where the stage was moved at a constant speed as the beads were trapped with the fixed trap center ( $F = 6\pi\eta rv$ , where  $\eta$ ,  $r$ , and  $v$  represent viscous drag, bead radius, and stage movement speed, respectively) (16).

### Single-trap experiment

A flow cell ( $\sim$ 18  $\mu$ L) was constructed with two coverslips (24  $\times$  60 mm<sup>2</sup> and 18  $\times$  18 mm<sup>2</sup>; Matsunami, Osaka, Japan). First, one cell volume of 10 mg/mL BSA in Basic buffer (50 mM KCl, 10 mM imidazole-HCl pH 7.4, 1 mM MgCl<sub>2</sub>, 1 mM EGTA, and 50  $\mu$ M CaCl<sub>2</sub>) was injected into the flow cell and incubated for  $\sim$ 15 min to coat the surface with BSA. Simultaneously, 1  $\mu$ L rhodamine-phalloidin-labeled actin filament (2.4  $\mu$ M, 10% biotinylated) was placed in a microtube (0.2 mL), fragmented by sonication for  $\sim$ 5 s, mixed with 10  $\mu$ L mDia1 beads, and incubated at

room temperature for 10 min in the dark to attach the barbed end of the fragmented fluorescent actin filaments to mDia1 on the bead surface.

For experiments with ATP-actin, 1  $\mu$ L mDia1 beads and 1  $\mu$ L avidin beads (diluted 50-fold with Basic buffer) were added to 97  $\mu$ L Basic buffer containing 10 mM DTT, 1 mM ATP, and an oxygen-scavenging system (0.22 mg/mL glucose oxidase, 0.036 mg/mL catalase, and 4.5 mg/mL glucose). Just before examination under the microscope, the beads were rapidly mixed with 1  $\mu$ L G-actin (various concentrations) and the mixture was promptly injected into the flow cell because actin polymerization was immediately initiated in solution upon G-actin addition to the mDia1 beads. For experiments with ADP-actin, the assay conditions were changed to 10 mM imidazole-HCl pH 7.4, 50 mM KCl, 1 mM EGTA, 1 mM MgCl<sub>2</sub>, 50  $\mu$ M CaCl<sub>2</sub>, 1 mM ADP, 10 mM DTT, 5 mM glucose, 15 U/mL hexokinase, 25  $\mu$ M Ap5A, and the oxygen-scavenging system.

A biotinylated and fluorescently labeled short actin filament, which had been bound to the mDia1 bead via its barbed end in advance, became the tip of the actin filament elongating from the mDia1 bead after the initiation of actin polymerization. Then, the tip was attached to the avidin bead by manipulating the mDia1 and avidin beads, using optical tweezers. The connection of two beads via an actin filament was confirmed by shifting one trap center and monitoring the other bead being pulled. After the actin dumbbell formation, the stage height was adjusted to  $\sim$ 5  $\mu$ m from the glass surface, using a piezo actuator (Physik Instrumente, Karlsruhe, Germany). Then, the stage was horizontally moved at a constant speed (15  $\mu$ m/s), using a stepping motor (Sigmakoki, Tokyo, Japan), in the direction parallel to the actin dumbbell and toward the mDia1 bead, followed by release of the mDia1 bead whereas the avidin bead remained trapped. Owing to solvent flow, a tensile force was applied to the actin filament; however, this force was low and had minimal effects on the polymerization rate, as shown in the [Results](#). Phase contrast images of the beads were recorded at 30 frames per second, with simultaneous monitoring of the centroid of the intensity profile of the trapped avidin bead in real time. During horizontal stage movement, stage height was maintained by continuous adjustment of the piezo actuator to maintain the center of the avidin bead in a constant position. Temperature was adjusted to  $26 \pm 1^\circ\text{C}$ . Experiments for each condition were performed with more than three actin dumbbells to calculate the mean elongation rates ( $\pm$ SDs), with at least two independently prepared samples of actin and mDia1 beads for each measurement.

The recorded images were analyzed using a Particle Track and Analysis plug-in (developed by Yoshiyuki Arai, Osaka University, Osaka, Japan) in ImageJ software (National Institutes of Health, Bethesda, MD) to determine the positions of the two beads. The elongation rate of an individual actin dumbbell was calculated from the linear fitting of the time course of bead-to-bead distance. Note that when the rate of actin depolymerization was calculated (with excess profilin) in the single-trap experiments, the actin filament was polymerized beforehand to some extent to extend the bead-to-bead distance by means of the double-trap setup. The end of the actin filament labeled with rhodamine-phalloidin was not depolymerized by profilin, which enabled us to prepare the actin dumbbell under depolymerization conditions.

Owing to labeling with rhodamine-phalloidin, a small amount of this conjugate remained during microscopic examination; however, this amount was only  $\sim$ 6 nM, one-third of which was estimated to be bound to actin filaments. Although the affinity of rhodamine-phalloidin for F-actin is high, its association rate at nanomolar concentrations is very low (dissociation equilibrium constant: 17 nM; association rate constant:  $2.8 \times 10^4 \text{ M}^{-1} \text{ s}^{-1}$ ; dissociation rate constant:  $4.8 \times 10^{-4} \text{ s}^{-1}$ ) (17), indicating that the remaining conjugate had almost no effect on the dynamics observed in our experiments. Notably, the fluorescence intensity of an actin filament between its fluorescent tip and the mDia1 bead did not increase during polymerization ([Fig. S1](#) and [Movie S1](#)), showing that the probability of free rhodamine-phalloidin binding to the barbed end of the growing actin filament is negligibly low. In addition, a small amount ( $\leq$ 4 nM) of ATP was carried over into the microscopic analysis because fluorescently labeled actin filaments were prepared with ATP-actin. The remaining ATP had been removed in experiments with ADP-actin because the fluorescently

labeled actin was incubated in assay buffer including hexokinase and Ap5A before mixing with ADP-G-actin (for details, see [Supporting Materials and Methods](#)).

## Double-trap experiment

The actin dumbbell was constructed as in the single-trap experiment. To apply a tensile force, the trap center of the mDia1 bead was shifted such that the distance between the two trap centers was increased. However, after this extension, both beads started to return to the respective trap centers owing to actin polymerization, which caused relaxation of the tension applied to the actin filament. To apply a constant tensile force, the tensile force, which was calculated from displacement of the avidin bead from its trap center, was monitored in real time and the mDia1 bead trap center was moved away from the avidin bead step by step when the tensile force decreased. This maintained the tensile force in approximately constant ranges, as strong (3.5–5.5), moderate (2.0–3.5), and weak (1.0–2.0 pN) forces (Fig. S2). Throughout our study, data on the strong force were mainly used for comparison with those in the single-trap experiments, whereas double-trap experiments with moderate and weak forces were performed to assess the elongation rate versus various forces at limited actin or profilin concentrations.

The elongation rate was estimated by linear fitting of the bead-to-bead distance time course; however, in contrast to the single-trap experiment, elongation of this distance could include a displacement owing to bead rotation, behaving as a nonlinear spring (18). Hence, discontinuous plots of the bead-to-bead distance at the same force (in the range of 4.0–4.2 pN; Fig. S2, *magenta plots*) during many pull-and-relaxation cycles ( $\geq 3$ ) were collected and linearly fitted to cancel out the displacement that arose from bead rotation (Fig. S3). Namely, the beads were rotated by repositioning the trap center, then the beads were rotated in the opposite direction by relaxation during filament elongation, so that the instantaneous change of bead-to-bead distance just after the stretching of actin dumbbells canceled out. For experiments with moderate or weak force, the time courses of the bead-to-bead distance in the ranges of 2.9–3.1 pN (Fig. S2, *cyan plots*) and 1.4–1.6 pN (Fig. S2, *orange plots*), respectively, were linearly fitted. The elongation rate was thus estimated by means of the discontinuous plots (*colored plots*, Fig. S2), whereas the corresponding tensile force was assumed to be an average of all continuous plots (*black plots*, Fig. S2) throughout the period analyzed.

To conduct double-trap after single-trap experiments using the same actin dumbbell, we had to instantly shift the stage height (along the *z*-axis direction) to catch the mDia1 bead by the other laser trap. The stage height was restored by adjusting the center of avidin bead to the original position. Experiments for each condition were performed with  $\geq 3$  actin dumbbells to calculate the mean and SD of elongation rates using at least two independently prepared actin and mDia1 bead samples.

## RESULTS

### Single-molecule strategy to measure force-dependent acceleration of actin polymerization

The actin dumbbell method was applied to measure the length of polymerizing actin filaments under force. Both ends of individual actin filament were attached to plastic beads, which were trapped with optical tweezers (Fig. 1 A) (4). Truncated mDia1 molecules composed of formin homology domain one (FH1) and two (FH2) of mDia1 (lacking autoinhibitory domains but maintaining a processive capping activity) were immobilized on one of two beads via the interaction between the GST-tag at the N-ter-

minus of mDia1 and the glutathione-coated bead surface. Biotinylated and fluorescently labeled short actin filaments became the tip of the polymerizing actin filament (pointed-end region) during polymerization in the unlabeled G-actin solution (Fig. S1; Movie S1). The pointed-end region was attached to the other bead via the biotin-avidin interaction to form an elongating actin dumbbell. Tension was applied (Fig. 1, B–D) by trapping one bead and moving the microscope stage at a constant rate (single-trap experiment) (15). Here, the tensile force estimated from the viscous drag mainly applied on the free bead was small; i.e., only 0.13 pN at an  $\sim 15 \mu\text{m/s}$  flow rate (Fig. 1 B, *right*). Alternatively, tension was applied in the double-trap experiment by trapping and manipulating both beads with optical tweezers, wherein the avidin bead was fixed to measure the applied force and the mDia1 bead was manually moved away to maintain nearly constant tension on the actin filament (Fig. S2; Fig. 1 B, *left*). The elongation rate was estimated by the time course of bead-to-bead distance. The mDia1 bead displacement reflects the barbed-end polymerization dynamics, because mDia1 moves via the processive capping activity (6) when the actin subunits associate with or dissociate from the barbed end. On the other hand, the pointed-end region of the actin filament bound to the avidin bead was stabilized by rhodamine-phalloidin. Hence, the bead-to-bead distance time course directly reflects the barbed end dynamics.

### Force-dependent acceleration of actin polymerization without profilin

First, we measured the effects of tension on the actin filament elongation rates at various ATP- and ADP-G-actin concentrations in the absence of profilin (Fig. 2, A and B). Under low tension (single-trap experiments;  $\sim 0.13$  pN), the elongation rate linearly increased with increasing G-actin concentration (Fig. 3, A and B), consistent with the nature of actin polymerization. The average elongation rate under tensile force (3.5–5.5 pN; average  $\sim 4$  pN) also correlated linearly with G-actin concentration (Fig. 3, A and B). Tension-mediated elongation accelerated slightly on ATP-G-actin (Fig. 3 A; Movie S2) but markedly on ADP-G-actin (Fig. 3 B; Movie S3). The effect of tension suggested that the elongation acceleration primarily resulted from the tension-dependent increase of the G-actin association rate with the barbed end (*slope*, Fig. 3, A and B).

In previous studies, two models explaining formin-mediated actin polymerization—the stair-stepping model and the stepping second model—were proposed (reviewed in (19)). Thus we applied these two models to our experimental results to explain the effect of stretching tension (Fig. 4, A and B) with the assumption of force-dependent property. On the basis of a previous report describing force-dependent elongation (8), both of our models assume that the FH2 dimer translocation is tightly coupled

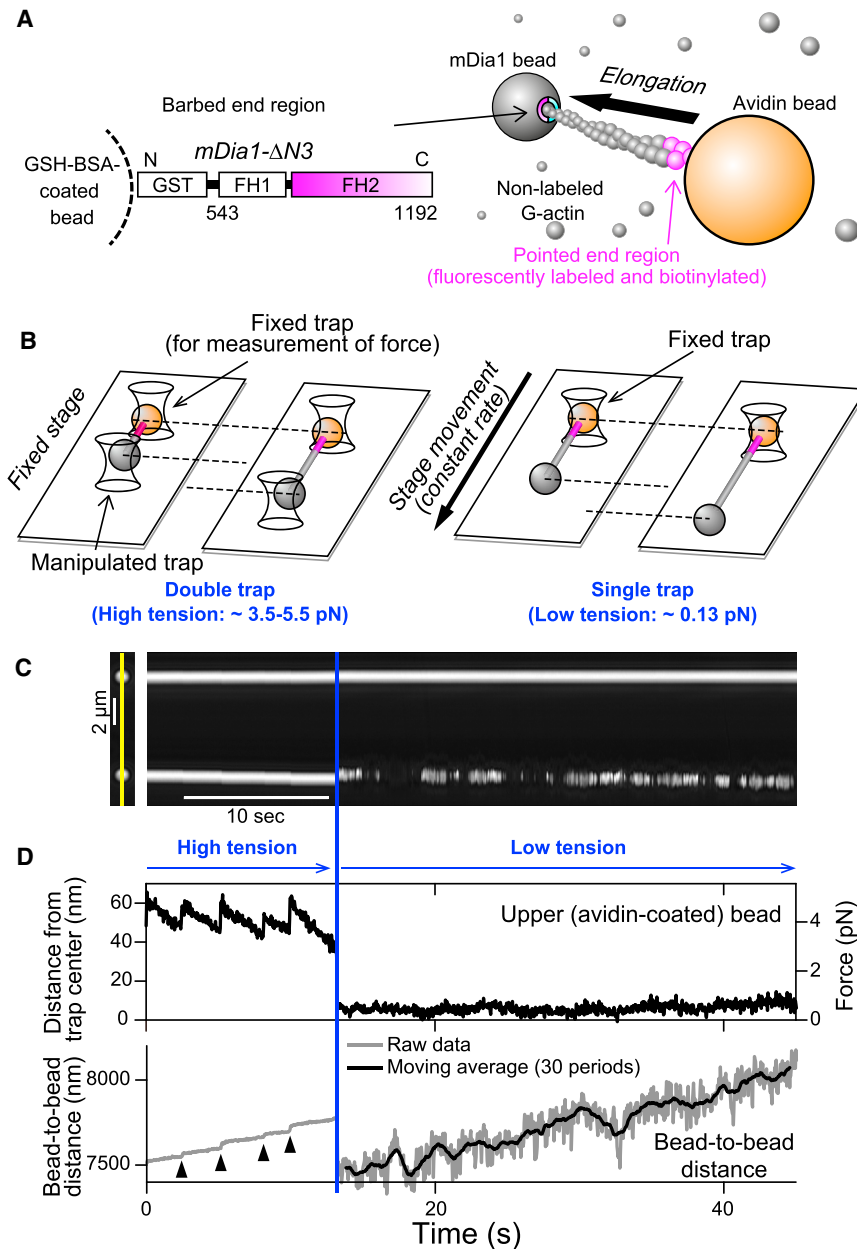

**FIGURE 1** Single-molecule method for observing mDia1-mediated actin polymerization. (A) Shown here is a schematic of the actin dumbbell. The gray ball represents the truncated mDia1-bound bead. Because G-actin is present in solution (small spheres), an actin filament elongates toward the bead (gray), to which an actin filament barbed end is attached via mDia1. (B) Shown here is a schematic of single- and double-trap experiments. In the double-trap experiment (left), the distance between the two trap centers is extended to generate higher tensile force (up to  $\sim 5.5$  pN), whereas in the single-trap experiment (right) the avidin bead (orange) is trapped whereas the mDia1 bead is free. (C) Shown here is kymography of the phase-contrast images of two beads. The time course of the two beads on the straight line across their centers (left image, yellow line) is shown. Double-trap experiments were performed until 12 s (blue line), when the mDia1 bead was released and stage movement was begun. Data were collected for  $0.2 \mu\text{M}$  ATP-G-actin. (D) Shown here is the time course of upper bead displacement from the trap center and the bead-to-bead distance (from (C)). Tensile force was estimated by converting the upper (avidin) bead displacement from the trap center (right axis). The instantaneous change of bead-to-bead distance (arrowheads) arose from the rotation, which occurred just after repositioning the trap center, as shown in Fig. S3. To see this figure in color, go online.

with actin polymerization/depolymerization (i.e., processive capping). In addition, although the stepping second model includes the process of FH2 dimer dissociation from the barbed end (19), we assume that this process is negligible because the detachment frequency was very low during the observation period. Actin filaments usually elongated submicrons to several microns long, which corresponds to the addition of hundreds to thousands of G-actin molecules to the formin-bound barbed end. The low dissociation probability was also reported by the previous study on Bni1p (on the order of once per 20,000 G-actin additions (20)).

Note that the actin dumbbells were often broken at extremely high tensions ( $> \sim 6$  pN), owing to the loss of connection between the two beads. However, it was difficult

to determine whether the breakage was due to the detachment of formin from the barbed end, severing of the actin filament, or detachment of formin from the bead. Therefore, in this study, we discuss the force-dependent elongation dynamics in conditions where actin dumbbells were highly stable ( $< \sim 6$  pN).

### Stair-stepping model

The stair-stepping model assumes that FH2 dimer bound to the actin filament barbed end has two conformational states, open and closed, derived from the crystal structures (21). The model also assumes that these states are in rapid equilibrium (19) and that G-actin can associate with the barbed



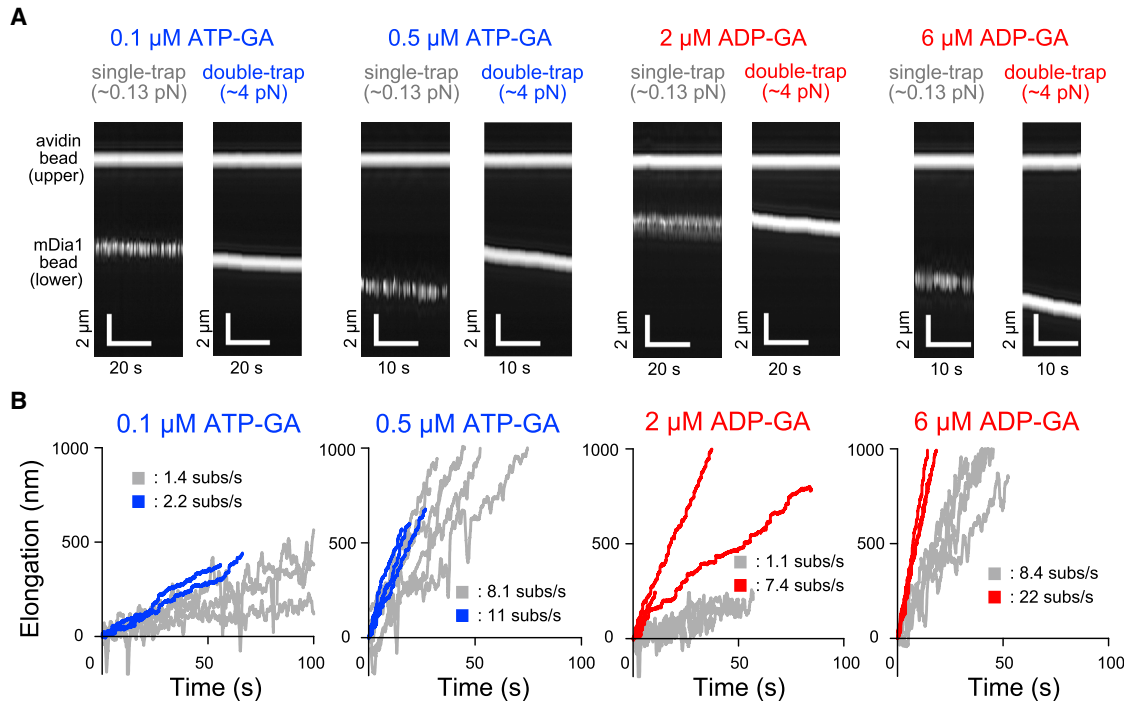

FIGURE 2 Time course of actin filament elongation in the absence of profilin. (A) Shown here is kymography of the phase contrast images of beads at various G-actin concentrations. The single and double trap experiments shown at each condition were obtained from the same actin dumbbell. (B) Given here are time courses of the bead-to-bead distance. Gray and colored lines indicate traces from single- ( $\sim 0.13$  pN) and double-trap experiments (3.5–5.5 pN), respectively. The average elongation rate (subunits/s) is shown. To see this figure in color, go online.

end only during the open state and dissociate only during the closed state (19) (Fig. 4, A and B, left). If we assume that the closed state probability decreases by stretching tension applied to the translocating FH2 dimer half ( $f$ ), the elongation rate  $v_{\text{elong}}$  as a function of  $f$  and G-actin concentration ( $C_A$ ), which is obtained by the subtraction of polymerization rate  $v_{\text{poly}}$  by depolymerization rate  $v_{\text{depoly}}$ , can be expressed using transition state theory (22) as

$$\begin{aligned} v_{\text{elong}} &= v_{\text{poly}} - v_{\text{depoly}} \\ &= k_{\text{on}} C_A \left\{ 1 - p_c^0 \exp(-fd/k_B T) \right\} \\ &\quad - k_{\text{off}} p_c^0 \exp(-fd/k_B T), \end{aligned} \quad (1)$$

where  $k_B$ ,  $T$ , and  $p_c^0$  represent the Boltzmann constant, absolute temperature, and probability of the closed state for the entire duration in the absence of an external force. The rate constants  $k_{\text{on}}$  and  $k_{\text{off}}$  indicate the G-actin association with, and dissociation from, the formin-bound actin filament barbed end, respectively (but not actin polymerization and depolymerization rates without formin). The probability of the closed state ( $p_c$ ) was changed by the external force as  $p_c = p_c^0 \exp(-fd/k_B T)$ . The distance (5.5 nm) over which the FH2 dimer-half moves during the closed- to open-state transition was the working distance ( $d$ ), and the stretching tension measured experimentally was assumed to be applied to the translocating FH2 dimer-half.

### Stepping second model

The stepping second model also assumes that the FH2 dimer has open and closed states in rapid equilibrium; however, the definition of these states differs from the stair-stepping model. The closed to open state transition does not correspond to the FH2 dimer translocation along the actin filament (19), but to the stretching of flexible linkers between two FH2 dimer halves. The open state probability ( $p_o$ ) was termed the “gating factor,” whose value depends on the isoform of formins, and the model assumes that both polymerization and depolymerization occur when the FH2 dimer is in the open state (19,23). In addition, this model hypothesizes that actin polymerization and depolymerization, respectively, correspond to before and after FH2 dimer translocation when the FH2 dimer is in the open state. Because translocation is known as the non-rate-limiting step, the pre- and posttranslocated states can also be assumed to be in rapid equilibrium (23), in addition to between the open and closed states (Fig. 4, A and B, right). Accordingly, the elongation rate can be expressed as

$$\begin{aligned} v_{\text{elong}} &= p_o k_{\text{on}} C_A \left\{ 1 - p_{\text{depoly}}^0 \exp(-fd/k_B T) \right\} \\ &\quad - p_o k_{\text{off}} p_{\text{depoly}}^0 \exp(-fd/k_B T), \end{aligned} \quad (2)$$

where  $p_o$  and  $p_{\text{depoly}}^0$  are, respectively, the gating factor and the depolymerizable state probability for open state in the

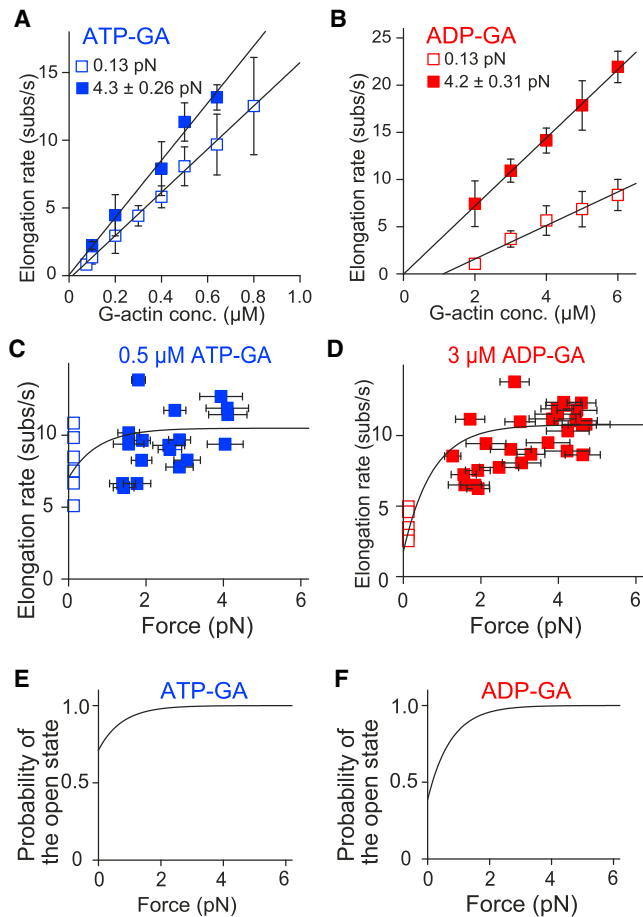

**FIGURE 3** Force-dependence of actin polymerization in the absence of profilin. (A and B) Given here are elongation rates under various ATP-G-actin (A) and ADP-G-actin (B) concentrations. Open and solid symbols represent mean elongation rates in low-tension single- and high-tension double-trap experiments, respectively. The numbers of actin dumbbells examined were as follows: 3, 4, 20, 6, 10, 6, 9, and 9 (single-trap) and 3, 11, 4, 4, and 3 (double-trap) from lower to higher ATP-G-actin concentration; and 5, 5, 6, 6, and 5 (single-trap) and 5, 14, 4, 3, and 5 (double-trap) from lower to higher ADP-G-actin concentration. Low and high-tension plots were globally fitted with Eq. 1 using corresponding tensile forces: 0.13 pN for low-tension experiments (estimated from the viscous drag), and the mean tensile forces 4.3 (ATP-G-actin) or 4.2 pN (ADP-G-actin) for high tension experiments (measured from the avidin bead displacement). Note that the curve with Eq. 2' is identical to that of Eq. 1 because these two equations are essentially the same, except that the  $p_c^0$  in Eq. 1 is replaced with  $p_{\text{depoly}}^0$  in Eq. 2'. Error bars indicate mean  $\pm$  SD. The optimal fitting curve values are shown in Table 1. (C and D) Given here is the force dependence of the elongation rate at specific G-actin concentrations: 0.5  $\mu\text{M}$  ATP-G-actin (C) and 3  $\mu\text{M}$  ADP-G-actin (D). Double-trap experiments (solid symbols) were performed at various tensile force ranges (including other than 3.5–5.5 pN). Each plot is from individual actin dumbbells. Parts of these data (3.5–5.5 pN) are included in the plots of (A) and (B). Single-trap experimental data (open symbols) are also shown. Computed curves are shown, constructed by Eq. 1 with values obtained by fitting in (A) and (B); (Table 1). Horizontal error bars indicate mean  $\pm$  SD of the tensile force during measurement. (E and F) Given here is the force dependence of the open state probability. The open state probability in the stair-stepping model, described as  $1 - p_c^0 \exp(-fd/k_B T)$ , was computed using the values obtained by fitting in (A) and (B) (Table 1). To see this figure in color, go online.

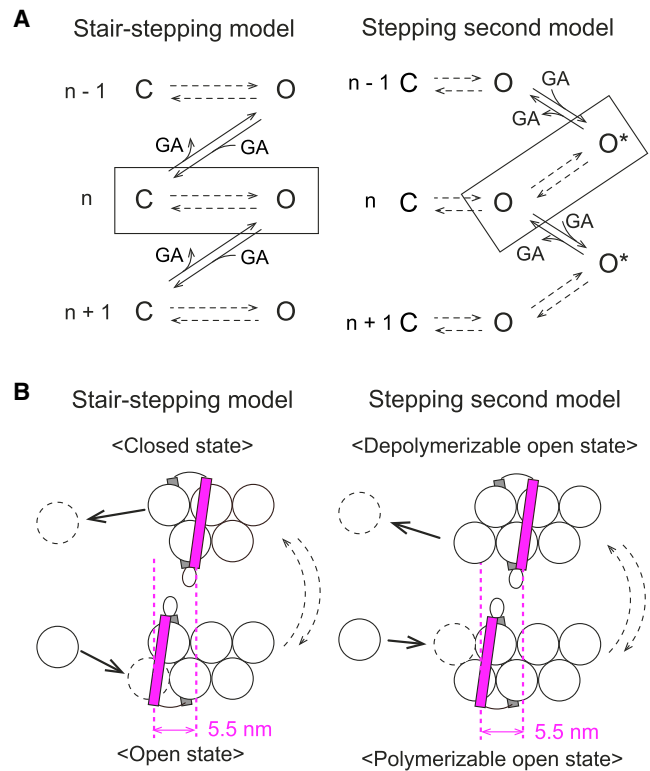

**FIGURE 4** Reaction schemes including force-dependent processes. (A) Given here are simplified schemes for stair-stepping and stepping second models. The polymerization or depolymerization processes of two actin subunits (shown as  $n - 1$  to  $n + 1$ ) are shown. The processes in rapid equilibrium are shown by broken arrows. The parts corresponding to FH2 dimer-half translocation are surrounded by a rectangle. C, closed state; O, open state. In the stepping second model, the two types of open state, polymerizable and depolymerizable, are shown as O and O\*, respectively. GA, G-actin. (B) Shown here is a schematic illustration of the reaction scheme parts corresponding to FH2 dimer-half translocation. White spheres are actin molecules; magenta/gray rectangles are FH2 dimer halves. Front (magenta) rectangle translocation corresponds to FH2 dimer transition from open to closed states (stair-stepping model) or depolymerizable to polymerizable open states (stepping second model). We assumed that the FH2 dimer half moves over the distance (5.5 nm) during the closed-to-open state transition. Although the FH2 dimer often dissociates from the barbed end during the FH2-half translocation in the stepping second model (19), the dissociation process is not included for simplification. To see this figure in color, go online.

absence of force. We also assume that  $p_o$  depends on the applied tension to maintain equation generality, and the depolymerizable state probability for the open state is decreased by the application of stretching tension. Although Eq. 2 originally differs from Eq. 1, these equations are identical for mDia1-mediated actin polymerization when  $p_o = 1$  (previously reported value for mDia1 (23)) is applied and is assumed not to be decreased by force:

$$v_{\text{elong}} = k_{\text{on}} C_A \left\{ 1 - p_{\text{depoly}}^0 \exp(-fd/k_B T) \right\} - k_{\text{off}} p_{\text{depoly}}^0 \exp(-fd/k_B T). \quad (2')$$

Accordingly, we analyzed the experimental data using Eq. 1. Plots of the elongation rate against G-actin concentrations (Fig. 3, A and B) were globally fitted with Eq. 1 with optimal parameter values (Table 1). The applied force was estimated from the viscous drag (0.13 pN for low-tension single-trap experiment) or measured from avidin bead displacement (4.3 pN for ATP-G-actin and 4.2 pN for ADP-G-actin, the averaged value of all actin dumbbells, for the high-tension double-trap experiment). Although the response of actin filament elongation differed between ATP-G-actin and ADP-G-actin, the difference is quantitatively explained by the single equation (Eq. 1). We can refer to the optimal value for  $p_c^0$  as for  $p_{\text{depoly}}^0$  when the stepping second model is considered. Note that the previous report assumed that the mDia1 gating factor was 0.5 for ADP-G-actin based on elongation rate ratio with and without mDia1 (23), whereas our experimental data could be reproduced by  $p_o = 1$  with optimal  $p_{\text{depoly}}^0$  value instead of assuming  $p_o = 0.5$ .

We measured the elongation rate at various stretching tensions using double-trap experiments at specific G-actin concentrations (Fig. S2). The relationship between the amount of force and the elongation rate (Fig. 3, C and D) was also well reproduced by Eq. 1 with the values obtained by global fit in Fig. 3, A and B (Table 1). Using the globally fitted optimal  $p_c^0$  values (Table 1), we computed the force dependency of the open state probability in the stair-stepping model described as  $1 - p_c = 1 - p_c^0 \exp(-fd/k_B T)$ , which is a part of Eq. 1 (Fig. 3, E and F). The results suggest that the FH2 dimer is most often in the open state (or the polymerizable open state for the stepping second model) under several piconewton stretching tension ( $> \sim 3$  pN).

### Mechanically regulated biphasic effects of profilin on actin polymerization

As previously reported in the literature (10,23–25), profilin biphasically affects formin-mediated actin polymerization irrespective of mechanical force. That is, appropriate profilin concentrations accelerate elongation from the formin-bound barbed end, whereas excessive profilin represses actin polymerization. In fact, excess profilin switches the actin filament dynamics from elongation to depolymeriza-

tion. Here, we examined the mechanical response of actin polymerization mediated by mDia1, focusing on the biphasic effects of profilin. With 0.2  $\mu\text{M}$  ATP-G-actin (Fig. 5, A and B), the low tension single-trap experiments reproduced these effects (Fig. 6 A, *open squares*). During repression by excess profilin (4–6  $\mu\text{M}$ ), high tension markedly altered the elongation rate (Figs. 5, A and B and 6 A, *solid squares*; Movie S4), accelerating it to levels equivalent to those of optimal profilin concentrations (1–2  $\mu\text{M}$ ). We confirmed the reversibility of this effect by alternately performing single-trap (low tension) and double-trap (high tension) experiments (Fig. 6 C; Movie S4).

In single-trap experiments on ADP-G-actin, profilin slightly accelerated actin filament elongation; however, equimolar profilin to ADP-G-actin ratios induced depolymerization (Figs. 5, A and B and 6 B, *open squares*). This trend was previously reported by Vavylonis et al. (23). In this study, we clarified that the effects of profilin on ADP-G-actin were obvious in the presence of several piconewton stretching tension (Fig. 6 B, *solid squares*; Movie S5). Notably, profilin had a potential to rapidly accelerate elongation with ADP-G-actin like that with ATP-G-actin, in contrast to previous studies with an absent (26) or small (23) profilin acceleration effect. Tension converted depolymerizing actin filaments to rapidly elongating filaments more dramatically than for ATP-G-actin. The depolymerization to rapid elongation switch was confirmed to be reversible (Fig. 6 D; Movie S5), as with ATP-G-actin and profilin.

## DISCUSSION

Here, we demonstrated several novel mechanical responses of mDia1 that affect the regulation of actin polymerization dynamics. First, we found that stretching tension enhanced actin filament elongation from mDia1 in the absence of profilin. This response is in contrast to the effect of force observed on Bni1p (7), where stretching tension inhibited elongation from Bni1p. We cannot fully explain this difference, although it might reflect different mechanical responses among formin family proteins.

Second, we found that the linear relationship between the elongation rates and the G-actin concentrations in the absence of profilin exhibited decreased critical concentration of polymerization with stretching tension (Fig. 3, A and B). This trend was more obvious for ADP-G-actin (Fig. 3 B) than for ATP-G-actin (Fig. 3 A). Thus, the results of this study experimentally confirmed the predicted force-dependent decrease in the critical concentration (5) and allowed the construction of a model in which stretching tension decreases the critical concentration via FH2 dimer translocation (Eqs. 1 and 2). The model by Jégou et al. (8), wherein the critical concentration was independent of stretching tension, thus could not reproduce our results. In contrast, our models Eqs. 1 and 2, which globally express force-dependent polymerization and depolymerization

**TABLE 1** Summary of Optimal Kinetic Values Obtained in the Absence of Profilin by Fitting with Eq. 1

|                                                      | ATP             | ADP             |
|------------------------------------------------------|-----------------|-----------------|
| $k_{\text{on}}$ ( $\mu\text{M}^{-1} \text{s}^{-1}$ ) | $21 \pm 0.40$   | $3.6 \pm 0.04$  |
| $k_{\text{off}}$ ( $\text{s}^{-1}$ )                 | $1.3 \pm 1.1$   | $3.9 \pm 1.3$   |
| $p_c^0$ ( $p_{\text{depoly}}^0$ )                    | $0.29 \pm 0.04$ | $0.61 \pm 0.04$ |

Values were obtained by global fit of the low- and high-tension experiment elongation rates shown in Fig. 3, A and B, with Eqs. 1 and 2', and the values correspond to the fitting curves (*straight lines*) in these figures. Fitting was performed using the software Origin (OriginLab, Northampton, MA). Values given are mean  $\pm$  SE.

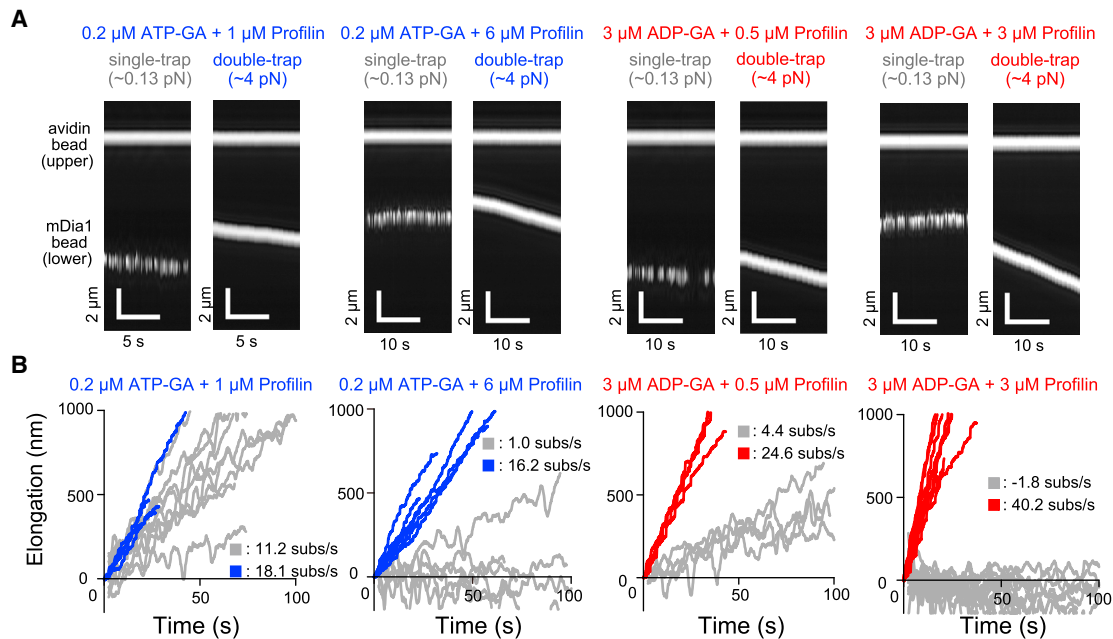

**FIGURE 5** Time course of elongation of actin filaments in the presence of profilin. (A) Given here is kymography of the phase contrast images of beads at various profilin concentrations and constant G-actin concentration. The single- and double-trap experiments shown at each condition were obtained from the same actin dumbbell. (B) Given here are time courses of bead-to-bead distances. Gray and colored lines show single- (moving average) and double-trap experiments (3.5–5.5 pN), respectively, with the average elongation rate (subunits/s). To see this figure in color, go online.

dynamics, successfully reproduced the experimental results. Although Courtemanche et al. (7) proposed that stretching tension affects the gating factor, it does not change the critical concentration. Therefore, it is more plausible that the probability of closed state in Eq. 1 (or depolymerizable state in Eq. 2) is assumed to be force dependent, as it can explain the force-dependent critical concentration decrease observed in our study.

Our notable result comprises the mechanical response in the presence of profilin, especially at high profilin concentrations. The effect of profilin on formin-mediated actin polymerization was known to be biphasic and the actin filament is in the depolymerization phase at high profilin concentrations (23,25). This effect is interpreted as the sum of two antagonistic effects; i.e., polymerization and depolymerization at the same barbed end. We observed the biphasic effect in our single-trap experiments. Moreover, the dramatic acceleration of elongation by stretching tension is also explainable by the coordination of the biphasic effect, with accelerated polymerization but repressed depolymerization. Repressed depolymerization is consistent with prior experimental results (8), although these did not detect the net elongation rate switch from minus to plus as the experiments were done in the absence of free G-actin.

On the basis of these findings, we constructed a schematic illustration that explains the effects of stretching tension on the profilin-related processes (Fig. 7). In Fig. 7, association and dissociation of actin at the barbed end in the profilin-related processes occur after and before FH2 dimer translo-

cation (Fig. 7, 3 [3'] and 4 [4']), respectively, similarly to the profilin-independent processes (Fig. 7, 1 [1'] and 2 [2']). Note that an important assumption regarding the flexible structure including the FH1 domain is included in our scheme. The acceleration of formin-mediated actin polymerization by profilin without mechanical force had been understood by the capture-and-delivery mechanism in which a flexible-looplike structure including the FH1 domain delivers the profilin-actin complex to the barbed end (23). The previous studies on stretching tension effects (7,8), however, somewhat complicated the mechanism; although stretching tension applied to the flexible structure was expected to inhibit delivery by repressing flexibility, tension actually facilitated actin filament elongation in the presence of profilin (7,8). Jégou et al. (8) suggested that part of the flexible structure including the FH1 domain necessary for capture and delivery remained accessible to the barbed end under the stretching tension, and FH2 dimer translocation was also induced. This geometric assumption was also adopted in our scheme but was not specifically drawn in Fig. 7 because the structural evidence remains insufficient (for details, see Fig. S4).

Our experimental results also suggest that stretching tension regulates the profilin-dependent processes of depolymerization and polymerization in parallel via force-enhanced FH2 dimer translocation. Our data indicate that tension inhibited profilin-dependent actin depolymerization while retaining the acceleration effect of polymerization. Assuming that stretching tension does not completely



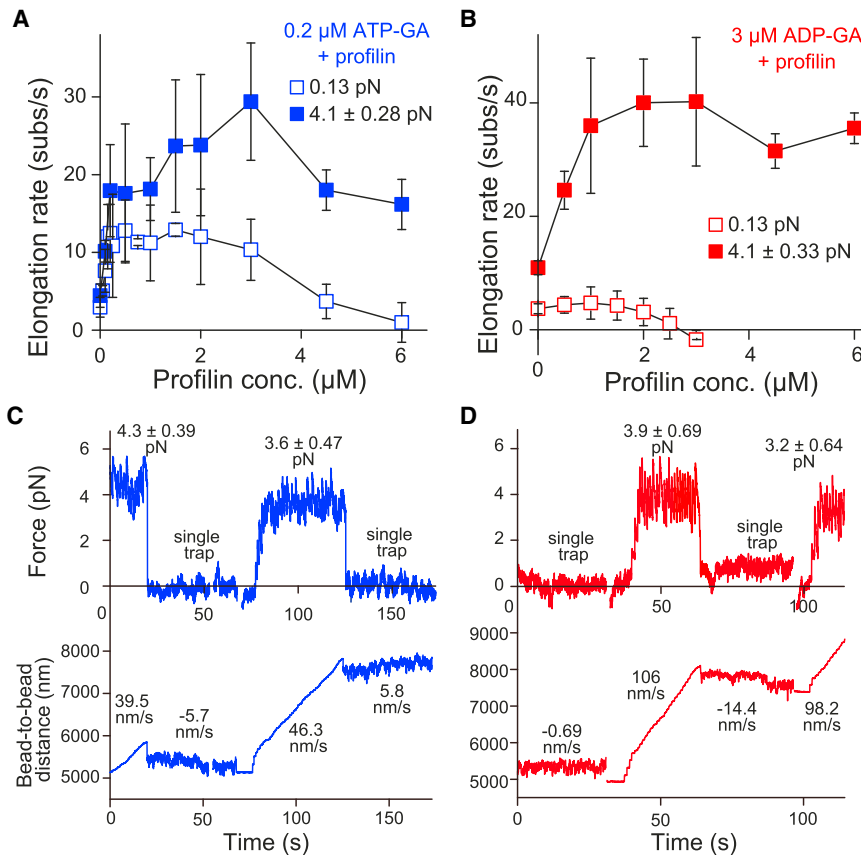

**FIGURE 6** Involvement of profilin in force-dependent elongation of actin filaments. (*A* and *B*) Elongation rates are shown at various profilin concentrations with  $0.2 \mu\text{M}$  ATP-G-actin (*A*) or  $3 \mu\text{M}$  ADP-G-actin (*B*). Open and solid symbols represent single- and double-trap experiments, respectively:  $n = 20, 6, 11, 6, 17, 6, 8, 3, 9, 3, 11, 15, 6,$  and  $6$  (single-trap) and  $11, 6, 12, 3, 5, 4, 7, 12, 5,$  and  $10$  (double-trap) for ATP-G-actin;  $5, 4, 5, 3, 4, 3,$  and  $17$  (single-trap) and  $14, 5, 7, 5, 19, 4,$  and  $3$  (double-trap) for ADP-G-actin, from lower to higher profilin concentration. Error bars indicate mean  $\pm$  SD. Tensile force is  $4.1 \pm 0.28$  (ATP-G-actin) and  $4.1 \pm 0.33$  pN (ADP-G-actin) (mean  $\pm$  SD). (*C* and *D*) Shown here is the reversibility of force-dependent actin filament elongation. The elongation rate force dependence observed upon excess profilin concentration is reversible. The actin filaments, which elongated very slowly, did not elongate, or depolymerized in the single-trap experiments (almost no tension), were shifted into the fast-elongation state by switching to the double-trap experiment (strong tensile force). Upon the mDia1 bead release, actin filament elongation returned to a very slow rate. (*C*) Shown here are  $0.2 \mu\text{M}$  ATP-G-actin and  $6 \mu\text{M}$  profilin. (*D*) Shown here are  $3 \mu\text{M}$  ADP-G-actin and  $3 \mu\text{M}$  profilin. To see this figure in color, go online.

inhibit the capture and delivery mechanism as previously suggested in Jégou et al. (8), the dissociation of actin subunits from the barbed end by profilin via the FH1 domain (capturing) would remain along with polymerization via

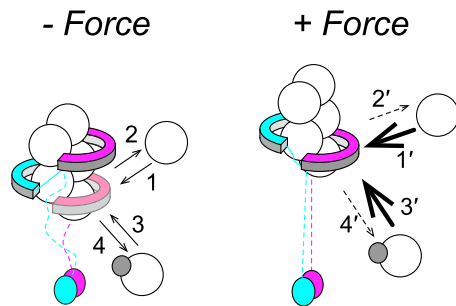

**FIGURE 7** Molecular model of force-dependent actin filament regulation. The large white and small gray spheres represent actin molecules and profilins, respectively. Stretching force enhances FH2 dimer-half (magenta) translocation to increase the open state probability. Numbered steps show G-actin association to and dissociation from the barbed end, independent of (1 [1'] and 2 [2']) and complexed with (3 [3'] and 4 [4']) profilin, respectively. Notably, 3 [3'] (and 4 [4']) include both FH1-dependent and independent processes. The capture-and-delivery mechanism of the profilin-actin complex between the flexible FH1 domain and the barbed end is assumed to remain functional under tension, but the FH1 domains are shown as broken lines because the structure has not yet been clarified (see Discussion). Under tension, steps 1 and 3 are accelerated, as shown by 1' and 3' (bold arrows), whereas steps 2 and 4 are repressed, as shown by 2' and 4' (broken arrows). To see this figure in color, go online.

FH1 domain delivery. Thus, actin depolymerization by profilin via the FH1 domain may be inhibited by FH2 dimer translocation, whereas the barbed end after FH2 translocation may accept the profilin-actin complex from the FH1 domain. Although we did not specifically depict the reaction pathways of profilin-dependent polymerization/depolymerization processes in Fig. 7 (3 [3'] and 4 [4']), these may consist of both capture and delivery by the FH1 domain and direct interaction with the barbed end without the FH1 domain. The direct association of the profilin-actin complex with the barbed end and dissociation of actin subunit from the barbed end by the binding of free profilin might also be regulated by FH2 dimer translocation in the same manner as the capture and delivery process as discussed above. Collectively, FH2 dimer translocation regulates both polymerization and depolymerization processes mediated by profilin in a force-dependent manner, similar to their profilin-independent regulation.

## CONCLUSION

These results indicate that the biphasic effect of profilin may be used to tune actin filament elongation rates in response to stretching tension. The degree of control by force is much higher than previously reported, as twofold acceleration of the polymerization rate (7,8), suggesting that profilin together with formin plays an important role

in force-induced actin cytoskeleton dynamic remodeling. Our findings provide further insight into the cellular function of profilin. Independent of formin, profilin facilitates actin polymerization through accelerating the exchange rate of nucleotides bound to G-actin from ADP to ATP; the slow rate of ADP release from ADP-G-actin in the absence of profilin ( $0.009 \text{ s}^{-1}$  at physiological conditions) is accelerated  $>100$ -fold after profilin binding (27). Additionally, profilin may have another role in collaboration with mDia1, independent of G-actin-bound nucleotide exchange. Mediated by external force, mDia1 accelerates the elongation rate of  $3 \mu\text{M}$  ADP-G-actin from 3.4 to 10.9 subs/s (Fig. 3 B,  $3 \mu\text{M}$  ADP-G-actin; Fig. 6 B,  $0 \mu\text{M}$  profilin). This is further amplified up to 40 subs/s by profilin at concentrations equivalent to that of ADP-G-actin (Fig. 6 B,  $3 \mu\text{M}$  profilin), which is comparable to the  $3 \mu\text{M}$  ATP-G-actin elongation rate (45 subs/s; an extrapolated value in Fig. 3 A). These findings may thus provide evidence for, to our knowledge, a novel role of profilin.

## SUPPORTING MATERIAL

Supporting Materials and Methods, four figures, and five movies are available at [http://www.biophysj.org/biophysj/supplemental/S0006-3495\(17\)30662-8](http://www.biophysj.org/biophysj/supplemental/S0006-3495(17)30662-8).

## AUTHOR CONTRIBUTIONS

H.K., M.M., K.K., and S.I. designed the experiments. H.K. performed the experiments and data analysis. H.K., M.M., and S.I. wrote the manuscript. M.M. and T.S. set up the microscope. T.O. prepared glutathione-conjugated BSA. All authors discussed the results.

## ACKNOWLEDGMENTS

We thank Y. Oguchi and H. Mizuno for helpful discussions and Y. Arai for providing the Particle Track and Analysis plug-in.

This work was supported by Grants-in-Aid for Specially Promoted Research grant 21000011, Scientific Research (S) grants 22227005 and 26221102, Young Scientists (B) grants 24740294 and 15K21444, Scientific Research on Innovative Areas grant 26115715, and Scientific Research (B) Generative Research Fields grant 16KT0077 from the Ministry of Education, Culture, Sports, Science, and Technology, Japan and a Waseda University Grant for Special Research Projects grants 2015B-295, 2015K-214, and 2016K-225.

## SUPPORTING CITATIONS

Reference (28) appears in the Supporting Material.

## REFERENCES

- del Rio, A., R. Perez-Jimenez, ..., M. P. Sheetz. 2009. Stretching single talin rod molecules activates vinculin binding. *Science*. 323:638–641.
- Hayakawa, K., H. Tatsumi, and M. Sokabe. 2011. Actin filaments function as a tension sensor by tension-dependent binding of cofilin to the filament. *J. Cell Biol.* 195:721–727.
- Buckley, C. D., J. Tan, ..., A. R. Dunn. 2014. Cell adhesion. The minimal cadherin-catenin complex binds to actin filaments under force. *Science*. 346:1254211.
- Shimozawa, T., and S. Ishiwata. 2009. Mechanical distortion of single actin filaments induced by external force: detection by fluorescence imaging. *Biophys. J.* 96:1036–1044.
- Kozlov, M. M., and A. D. Bershadsky. 2004. Processive capping by formin suggests a force-driven mechanism of actin polymerization. *J. Cell Biol.* 167:1011–1017.
- Higashida, C., T. Miyoshi, ..., N. Watanabe. 2004. Actin polymerization-driven molecular movement of mDia1 in living cells. *Science*. 303:2007–2010.
- Courtemanche, N., J. Y. Lee, ..., E. C. Greene. 2013. Tension modulates actin filament polymerization mediated by formin and profilin. *Proc. Natl. Acad. Sci. USA*. 110:9752–9757.
- Jégou, A., M. F. Carrier, and G. Romet-Lemonne. 2013. Formin mDia1 senses and generates mechanical forces on actin filaments. *Nat. Commun.* 4:1883.
- Romero, S., C. Le Clainche, ..., M. F. Carrier. 2004. Formin is a processive motor that requires profilin to accelerate actin assembly and associated ATP hydrolysis. *Cell*. 119:419–429.
- Kovar, D. R., E. S. Harris, ..., T. D. Pollard. 2006. Control of the assembly of ATP- and ADP-actin by formins and profilin. *Cell*. 124:423–435.
- Mizuno, H., C. Higashida, ..., N. Watanabe. 2011. Rotational movement of the formin mDia1 along the double helical strand of an actin filament. *Science*. 331:80–83.
- Tuderman, L., E. R. Kuutti, and K. I. Kivirikko. 1975. An affinity-column procedure using poly(L-proline) for the purification of prolyl hydroxylase. Purification of the enzyme from chick embryos. *Eur. J. Biochem.* 52:9–16.
- Kaiser, D. A., P. J. Goldschmidt-Clermont, ..., T. D. Pollard. 1989. Characterization of renatured profilin purified by urea elution from poly-L-proline agarose columns. *Cell Motil. Cytoskeleton*. 14:251–262.
- Kondo, H., and S. Ishiwata. 1976. Uni-directional growth of F-actin. *J. Biochem.* 79:159–171.
- Oguchi, Y., S. Uchimura, ..., S. Ishiwata. 2011. The bidirectional depolymerizer MCAK generates force by disassembling both microtubule ends. *Nat. Cell Biol.* 13:846–852.
- Nishizaka, T., H. Miyata, ..., K. Kinoshita, Jr. 1995. Unbinding force of a single motor molecule of muscle measured using optical tweezers. *Nature*. 377:251–254.
- De La Cruz, E. M., and T. D. Pollard. 1994. Transient kinetic analysis of rhodamine phalloidin binding to actin filaments. *Biochemistry*. 33:14387–14392.
- Dupuis, D. E., W. H. Guilford, ..., D. M. Warshaw. 1997. Actin filament mechanics in the laser trap. *J. Muscle Res. Cell Motil.* 18:17–30.
- Paul, A. S., and T. D. Pollard. 2009. Review of the mechanism of processive actin filament elongation by formins. *Cell Motil. Cytoskeleton*. 66:606–617.
- Paul, A. S., and T. D. Pollard. 2008. The role of the FH1 domain and profilin in formin-mediated actin-filament elongation and nucleation. *Curr. Biol.* 18:9–19.
- Otomo, T., D. R. Tomchick, ..., M. K. Rosen. 2005. Structural basis of actin filament nucleation and processive capping by a formin homology 2 domain. *Nature*. 433:488–494.
- Bell, G. I. 1978. Models for the specific adhesion of cells to cells. *Science*. 200:618–627.
- Vavylonis, D., D. R. Kovar, ..., T. D. Pollard. 2006. Model of formin-associated actin filament elongation. *Mol. Cell*. 21:455–466.
- Courtemanche, N., and T. D. Pollard. 2012. Determinants of formin homology 1 (FH1) domain function in actin filament elongation by formins. *J. Biol. Chem.* 287:7812–7820.

25. Pernier, J., S. Shekhar, ..., M. F. Carlier. 2016. Profilin interaction with actin filament barbed end controls dynamic instability, capping, branching, and motility. *Dev. Cell.* 36:201–214.
26. Romero, S., D. Didry, ..., M. F. Carlier. 2007. How ATP hydrolysis controls filament assembly from profilin-actin: implication for formin processivity. *J. Biol. Chem.* 282:8435–8445.
27. Selden, L. A., H. J. Kinosian, ..., L. C. Gershman. 1999. Impact of profilin on actin-bound nucleotide exchange and actin polymerization dynamics. *Biochemistry.* 38:2769–2778.
28. Uemura, S., H. Higuchi, ..., S. Ishiwata. 2004. Mechanochemical coupling of two substeps in a single myosin V motor. *Nat. Struct. Mol. Biol.* 11:877–883.

**Biophysical Journal, Volume 113**

**Supplemental Information**

**Biphasic Effect of Profilin Impacts the Formin mDia1 Force-Sensing  
Mechanism in Actin Polymerization**

**Hiroaki Kubota, Makito Miyazaki, Taisaku Ogawa, Togo Shimosawa, Kazuhiko Kinoshita,  
Jr., and Shin'ichi Ishiwata**



## SUPPLEMENTAL MATERIALS AND METHODS

### Plasmid construction

The nucleotide sequences corresponding to the 650-amino acid (aa) sequence of mammalian homolog of diaphanous 1 (mDia1), including FH1 and FH2 (residues 543–1192), from mouse cDNA were cloned into the pGex6P-1 vector (GE Healthcare, Buckinghamshire, UK) between *Bam*HI and *Xho*I sites and expressed as an N-terminally GST-tagged fusion protein. The truncated mDia1 (650 aa) was used in previous studies (1,2) and was designated mDia1 $\Delta$ N3. In the present study, the expressed protein was simply referred to as mDia1.

Full-length profilin I from mouse cDNA was cloned into the pRSET-A vector (Life Technologies, CA, USA) between its *Nde*I and *Eco*RI sites and was expressed without the His-tag.

### Protein preparation

Truncated mDia1 expressed in *Escherichia coli* Rosetta II competent cells (Merck Millipore, Bellerica, MA, USA) was purified using Glutathione-Sepharose HP resin (GE Healthcare), as previously reported (1). Profilin I was expressed in *E. coli* Rosetta II cells and purified using poly-L-proline sepharose according to previous reports (3,4). Poly-L-proline sepharose was prepared by coupling poly-L-proline (Sigma-Aldrich, St. Louis, MO, USA) with cyanogen bromide (CNBr)-activated sepharose (GE Healthcare). The concentrations of mDia1 and profilin were measured by the Bradford assay based on a standard curve obtained with bovine serum albumin (BSA; Sigma-Aldrich). Purified proteins were stored at  $-80^{\circ}\text{C}$ .

G-actin was purified from acetone powder prepared from rabbit skeletal muscle, as previously reported (5), and was stored in ATP-G-buffer (2 mM Tris-HCl [pH 8.0], 2 mM  $\text{NaN}_3$ , 50  $\mu\text{M}$   $\text{CaCl}_2$ , and 0.1 mM ATP) at  $-80^{\circ}\text{C}$ . For actin preparation, all procedures conformed to the Guidelines for Proper Conduct of Animal Experiments approved by the Science Council of Japan and were performed according to the Regulations for Animal Experimentation at Waseda University. For microscopic analysis, the G-actin solution was thawed and polymerized by adding one-fifth volume of 5 $\times$  ATP-F-buffer (500 mM KCl, 10 mM  $\text{MgCl}_2$ , 10 mM 3-morpholinopropanesulfonic acid [MOPS, pH 7.0], and 7.5 mM  $\text{NaN}_3$ ). After centrifugation (436,000  $\times$  g, 30 min,  $8^{\circ}\text{C}$ ), the precipitated F-actin was dialyzed against ATP-G-buffer and centrifuged again (436,000  $\times$  g, 30 min,  $2^{\circ}\text{C}$ ). The supernatant was used in the experiment with ATP-G-actin within 1 week. The concentration of G-actin was calculated by dividing its absorbance at 290 nm by  $0.63 \text{ (mg/mL)}^{-1}$ . For preparation of ADP-G-actin, an equal volume of 2 $\times$  ADP-F-buffer (20 mM imidazole-HCl [pH 7.0], 200 mM KCl, 2 mM  $\text{MgCl}_2$ , 0.4 mM EGTA, 0.2 mM ADP, 2 mM dithiothreitol [DTT], 10 mM glucose, and 15 U/mL hexokinase [Sigma-Aldrich]) was added to the preserved ATP-G-actin (1 mg/mL), with incubation for 30 min at room temperature ( $24 \pm 2^{\circ}\text{C}$ ) for polymerization. After centrifugation (436,000  $\times$  g, 30 min,  $4^{\circ}\text{C}$ ), the pellet was resuspended in ADP-G-buffer (2 mM Tris-HCl [pH 8.0], 0.1 mM  $\text{CaCl}_2$ , 0.2 mM ADP, 1 mM DTT, 5 mM glucose, 15 U/mL hexokinase, and 25  $\mu\text{M}$  Ap5A [Sigma-Aldrich]), briefly sonicated (5 s), and incubated on ice for 1 h. The prepared ADP-G-actin was used within 3 h.

Fluorescently labeled actin filaments (10% biotinylated) were prepared as described previously (6).

### **Preparation of IC5-labeled avidin beads**

Since two types of 1- $\mu$ m beads (mDial-immobilized and neutravidin-coated beads, referred to as “mDial beads” and “avidin beads”) were present in the assay solution, these two types of beads had to be distinguished somehow during microscopic analysis. Therefore, the avidin beads were labeled with another fluorescent dye, IC5, which has fluorescent properties ( $\lambda_{\text{ex}} = 640$  nm,  $\lambda_{\text{em}} = 660$  nm) different from those of rhodamine ( $\lambda_{\text{ex}} = 540$  nm,  $\lambda_{\text{em}} = 565$  nm). IC5-conjugated BSA and neutravidin were bound to 1- $\mu$ m beads at the same time for fluorescent labeling with IC5. Thus, red laser light (633 nm) excited the avidin beads, but not the mDial beads, allowing for discrimination between the two types of beads. Furthermore, the avidin beads could also be excited by green laser light (532 nm), which excited rhodamine-labeled short actin filaments due to the fluorescence of 1- $\mu$ m beads. This situation was convenient for manipulations involving connection of short actin filaments to the avidin beads. IC5 labeling of BSA was performed using IC5-maleimide (Dojindo, Kumamoto, Japan).

Immobilization of IC5-conjugated BSA and neutravidin on carboxylate-modified 1- $\mu$ m polystyrene beads (F8814 blue fluorescent microspheres; Life Technologies) was performed by amine coupling, as previously reported (7,8). First, a precipitate from 50  $\mu$ L of beads obtained by centrifugation ( $16,000 \times g$ , 1 min, 4°C) was resuspended and washed with 1 mL of 0.1 M sodium carbonate buffer (pH 9.6) three times. Next, the beads were washed with 1 mL of 20 mM sodium phosphate buffer (pH 4.7) three times and resuspended in 100  $\mu$ L of 20 mM sodium phosphate buffer (pH 4.7). Next, 20  $\mu$ L of 2 M ethylene dichloride (EDC; Thermo Fisher Scientific, Waltham, MA, USA) in 0.5 mM MOPS buffer (pH 7.0) was added to the resuspended beads, and the mixture was incubated at room temperature for 20 min, followed by addition of 40  $\mu$ L of 2 M N-hydroxysulfosuccinimide (Sulfo-NHS; Thermo Fisher Scientific) and incubation at room temperature for 20 min. Then, after washes with 1 mL of 200 mM sodium borate buffer (pH 8.4) three times, the beads were resuspended in 100  $\mu$ L of 200 mM sodium borate buffer (pH 8.4) and incubated overnight at 4°C after the addition of 20  $\mu$ L of 5 mg/mL neutravidin (Life Technologies) and 2  $\mu$ L IC5-conjugated BSA (~10 mg/mL). After quenching of the reaction by addition of 250 mM 2-ethanolamine and incubation at 4°C for 30 min, the beads were washed with 1 mL of 2 mg/mL BSA in 200 mM sodium borate buffer (pH 8.4) three times. Finally, the beads were resuspended in 200  $\mu$ L of 20 mM sodium phosphate buffer (pH 7.4) containing 1 mg/mL BSA, 15 mM NaCl<sub>2</sub>, 15 mM NaN<sub>3</sub>, and 5% (v/v) glycerol. The prepared avidin beads were kept on ice and used within 3 weeks.

### **Conjugation of glutathione to BSA**

For conjugation of glutathione to BSA without reducing the affinity for GST, the SH group of reduced glutathione (GSH) must be covalently linked to BSA via a maleimide group. After blocking of the SH groups of BSA (35 groups per molecule) by N-ethylmaleimide, an amino

group of blocked BSA was linked to a N- $\gamma$ -maleimidobutyryl-oxysuccinimide ester (GMBS) crosslinker, allowing for protrusion of the reactive maleimide group from BSA, to which GSH could be attached. Briefly, 0.2 mL of 1.1 mM N-ethylmaleimide (NEM) in dimethylformamide was added to 2 mL of 50 mg/mL BSA (Sigma-Aldrich) in HEPES-EDTA buffer (100 mM HEPES-KOH [pH 7.2] and 10 mM EDTA), which was gently stirred, and the mixture was incubated at room temperature for 90 min. Next, the mixture was dialyzed against 1 L of HEPES-EDTA buffer overnight at 4°C. The volume of the sample solution increased approximately 1.2-fold during the dialysis, yielding a BSA solution with a concentration of approximately 40 mg/mL. After dialysis, 200  $\mu$ L of the sample was mixed with 800  $\mu$ L of HEPES-EDTA buffer, and the mixture was then incubated with stirring at room temperature for 30 min after addition of 100  $\mu$ L of 110 mM GMBS (Thermo Fisher Scientific). Next, 1.1 mL of 0.2 M GSH in HEPES-EDTA buffer was added to the sample, and the mixture was incubated at room temperature for 1 h, followed by dialysis against 20 mM Tris-HCl (pH 7.5) with 100 mM KCl. The concentration of glutathione-conjugated BSA estimated in its final volume was approximately 6 mg/mL. The prepared glutathione-conjugated BSA was rapidly frozen by liquid nitrogen and stored at  $-80^{\circ}\text{C}$ .

### **Preparation of the mDia1 beads via the GST-glutathione interaction**

After mixing 2  $\mu$ L of 1- $\mu$ m polystyrene beads (F8814 blue fluorescent microspheres; Life Technologies) with 18  $\mu$ L HEPES-EDTA buffer (100 mM HEPES-KOH [pH 7.2] and 10 mM EDTA), 15  $\mu$ L of the mixture was added to 15  $\mu$ L of glutathione-conjugated BSA ( $\sim$ 6 mg/mL), and the mixture was incubated at room temperature for 15 min. Next, 100  $\mu$ L of 10 mg/mL BSA in Basic buffer (50 mM KCl, 10 mM imidazole-HCl [pH 7.4], 1 mM  $\text{MgCl}_2$ , 1 mM EGTA, and 50  $\mu$ M  $\text{CaCl}_2$ ) was added, followed by incubation at room temperature for 5 min. After centrifugation ( $16,000 \times g$ , 1 min, 4°C), the precipitated beads were resuspended in 100  $\mu$ L of 10 mg/mL BSA in Basic buffer. The beads were washed three times using this process and resuspended in 300  $\mu$ L of 10 mg/mL BSA in Basic buffer. Next, 1.5  $\mu$ L of 270 nM mDia1 was added to the beads with incubation on ice overnight. After centrifugation ( $16,000 \times g$ , 1 min, 4°C) and four washes with 300  $\mu$ L of 10 mg/mL BSA in Basic buffer, the precipitated beads (mDia1 beads) were resuspended in 300  $\mu$ L of 10 mg/mL BSA in Basic buffer and subjected to microscopic analysis within 1 day.

### **Supporting References**

1. Higashida, C., T. Miyoshi, A. Fujita, F. Ocegüera-Yanez, J. Monypenny, Y. Andou, S. Narumiya, and N. Watanabe. 2004. Actin polymerization-driven molecular movement of mDia1 in living cells. *Science*. 303:2007–2010.

2. Mizuno, H., C. Higashida, Y. Yuan, T. Ishizaki, S. Narumiya, and N. Watanabe. 2011. Rotational movement of the formin mDia1 along the double helical strand of an actin filament. *Science*. 331:80–83.
3. Tuderman, L., E.R. Kuutti, and K.I. Kivirikko. 1975. An affinity-column procedure using poly(L-proline) for the purification of prolyl hydroxylase. Purification of the enzyme from chick embryos. *Eur. J. Biochem.* 52:9–16.
4. Kaiser, D.A., P.J. Goldschmidt-Clermont, B.A. Levine, and T.D. Pollard. 1989. Characterization of renatured profilin purified by urea elution from poly-L-proline agarose columns. *Cell Motil. Cytoskeleton.* 14:251–262.
5. Kondo, H., and S. Ishiwata. 1976. Uni-directional growth of F-actin. *J. Biochem.* 79:159–171.
6. Uemura, S., H. Higuchi, A.O. Olivares, E.M. De La Cruz, and S. Ishiwata. 2004. Mechanochemical coupling of two substeps in a single myosin V motor. *Nat. Struct. Mol. Biol.* 11:877–883.
7. Shimozawa, T., and S. Ishiwata. 2009. Mechanical distortion of single actin filaments induced by external force: detection by fluorescence imaging. *Biophys. J.* 96:1036–1044.
8. Oguchi, Y., S. Uchimura, T. Ohki, S.V. Mikhailenko, and S. Ishiwata. 2011. The bidirectional depolymerizer MCAK generates force by disassembling both microtubule ends. *Nat. Cell Biol.* 13:846–852.
9. Dupuis, D.E., W.H. Guilford, J. Wu, and D.M. Warshaw. 1997. Actin filament mechanics in the laser trap. *J. Muscle Res. Cell Motil.* 18:17-30.
10. Jégou, A., M.F. Carlier, and G. Romet-Lemonne. 2013. Formin mDia1 senses and generates mechanical forces on actin filaments. *Nat. Commun.* 4:1883.
11. Paul, A.S., and T.D. Pollard. 2008. The role of the FH1 domain and profilin in formin-mediated actin-filament elongation and nucleation. *Curr. Biol.* 18:9-19.



Figure S1

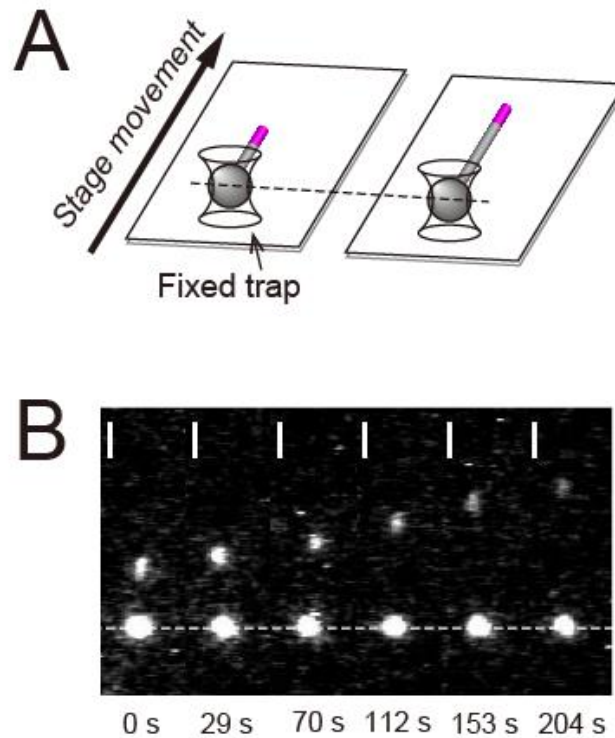

**Figure S1.** Fluorescent images showing the tip of the actin filament moving away from the mDia1 bead.

(A) Schematic illustration of the experiment showing actin polymerization from the mDia1 bead. While the mDia1 bead (gray sphere) was trapped by optical tweezers, the stage of the microscope was moved at a constant speed. The distance between the fluorescently labeled tip (magenta part) and the mDia1 bead increased with time because of the successive polymerization of unlabeled G-actin at the barbed end. (B) Fluorescent images showing elongation of the actin filament from the mDia1 bead (lower object). These images correspond to Supplementary **Movie 1**. The vertical scale bars are 2  $\mu\text{m}$ .

Figure S2

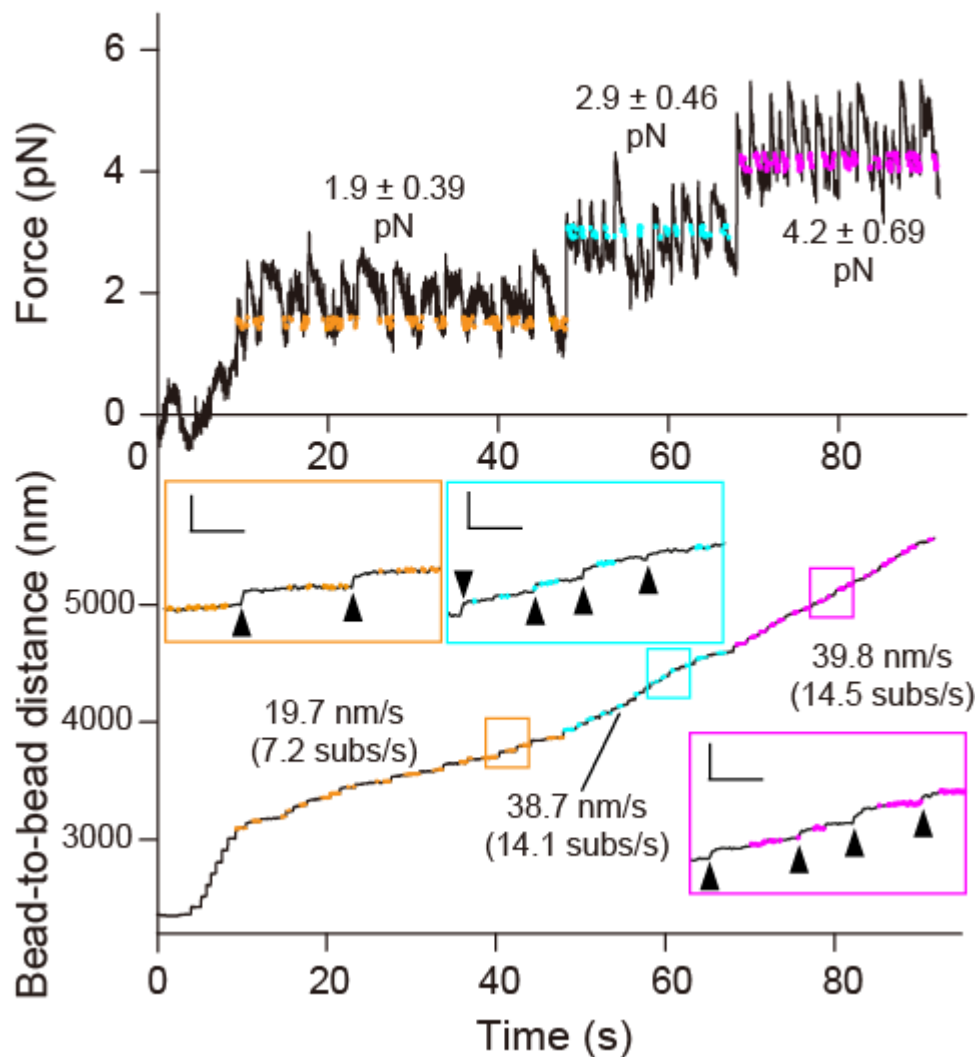

**Figure S2.** Estimation of the tensile force and elongation rate in the double-trap experiment. Two processes, i.e., extension of the distance between the trap centers via manipulation to maintain the tensile force nearly constant and relaxation of the tensile force due to elongation of the actin filament via polymerization, were repeated several times in the double-trap experiment. The trap centers were manually (not automatically) manipulated to keep the applied force nearly constant during elongation of the actin filament, and the tensile force could be approximately maintained. Almost all the experiments were conducted in the range of strong force (3.5–5.5 pN) to be compared with the data from single-trap experiments, whereas at a specific protein concentration, the double-trap experiments were performed in two other ranges of the tensile force: 2.0–3.5 pN as a moderate force and 1.0–2.0 pN as a weak force. To minimize the effects of rotation of beads on the measurement of bead-to-bead distance, plots with a limited tensile force were linearly fitted for estimation of the elongation rate. The plots in the ranges 1.4–1.6 (orange plots), 2.9–3.1 (cyan plots), and 4.0–4.2 pN (magenta plots) were used for linear fitting for the experiments under weak-, moderate-, and strong-force conditions, respectively. The partial time courses of these three force ranges are shown as enlarged views (insets surrounded by orange, cyan, magenta

rectangles), and arrowheads show the instantaneous changes of bead-to-bead distance due to the shift of trap center. Vertical and horizontal scale bars in insets are 100 nm and 1 sec, respectively. Although the elongation rate was estimated with the limited plots, the corresponding tensile force was obtained by averaging all continuous plots throughout the period in question (from the first to the last plots for estimation of the elongation rate). The present figure corresponds to 0.2  $\mu\text{M}$  ATP-G-actin and 6  $\mu\text{M}$  profilin.

Figure S3

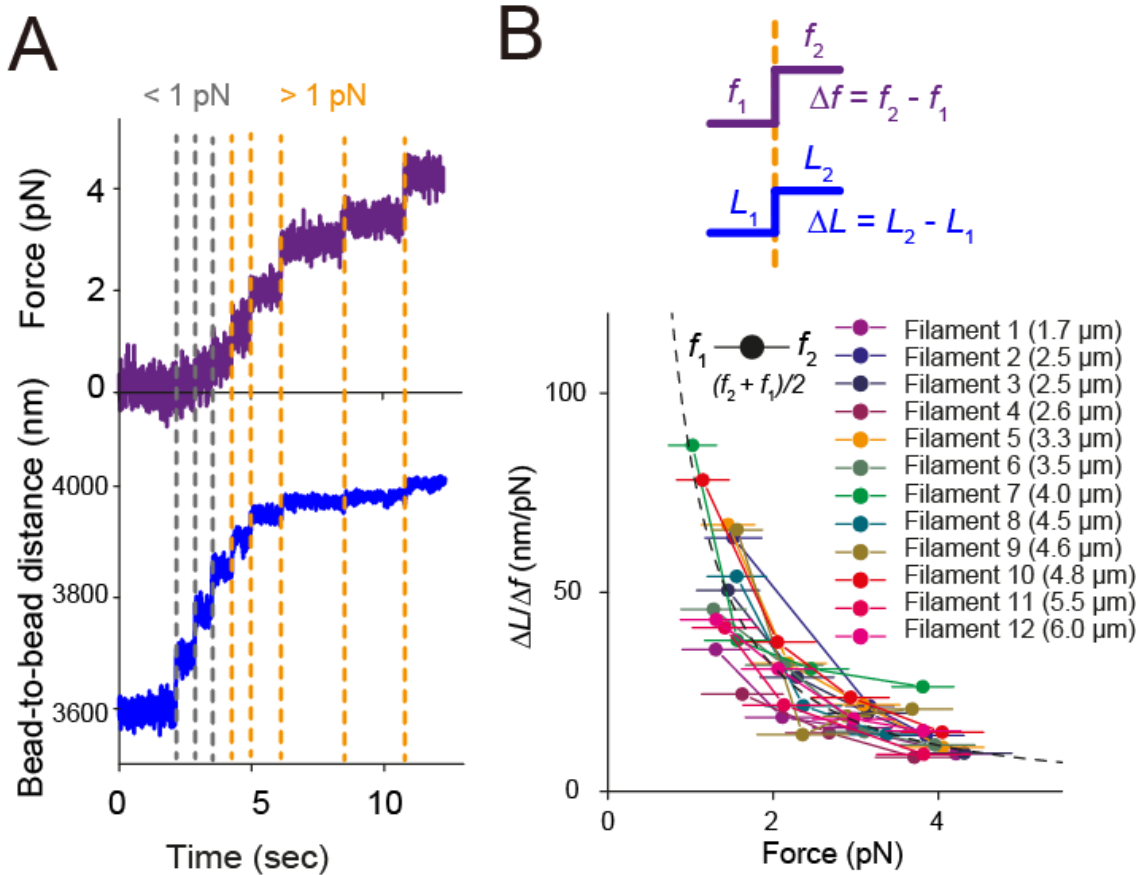

**Figure S3** Force-dependent and actin polymerization-independent change of the bead-to-bead distance.

(A) A typical example of the change of the bead-to-bead distance caused by shifting the trap center. The double-trap experiment was performed at a low concentration of ATP-G-actin (75 nM) at which actin polymerization was slow (1.6 subunits/sec = 4.4 nm/sec at 4-pN pulling force, estimated from **Fig. 3A**) to measure the actin polymerization-independent change of the bead-to-bead distance. When one of the trap center trapping the mDia1 bead was shifted, the bead-to-bead distance instantaneously changed (gray and orange vertical broken lines). Stiffness of the laser trap was 0.024 pN/nm. (B) Non-linear relationship between stretching tension and the mechanical compliance (the reciprocal of stiffness) of actin dumbbells. The mechanical compliance ( $\Delta L/\Delta f$ ) calculated from  $f_1$ ,  $f_2$  (the average forces for 0.1-sec period before and after the shift of the trap center, respectively), and  $L_1$ ,  $L_2$  (the bead-to-bead distances before and after the shift of the trap center, respectively) was plotted against the averaged force  $(f_2 + f_1)/2$ . Left and right sides of horizontal error bars are  $f_1$  and  $f_2$ , respectively. Twelve



independent experiments were performed with different lengths of actin filaments. The bead-to-bead distance just after the application of stretching tension that reached  $>2.0$  pN (2.1-2.9 pN) is shown in parentheses. Only the events at which the averaged force  $(f_2 + f_1)/2$  was greater than 1 pN (orange broken lines in **Fig. S3A**) were analyzed, because 1 pN is the minimum value for the measurement of actin filament elongation rate in the double-trap experiment. Results of all twelve filaments were fitted with a single equation that describes non-linear property of  $dL/dF$  arising from force-dependent rotation of beads in actin dumbbells (9), with an optimal flexural rigidity ( $EI$ ) value (33,900 pN nm<sup>2</sup>). The fitting curve is shown as a broken line.

Figure S4

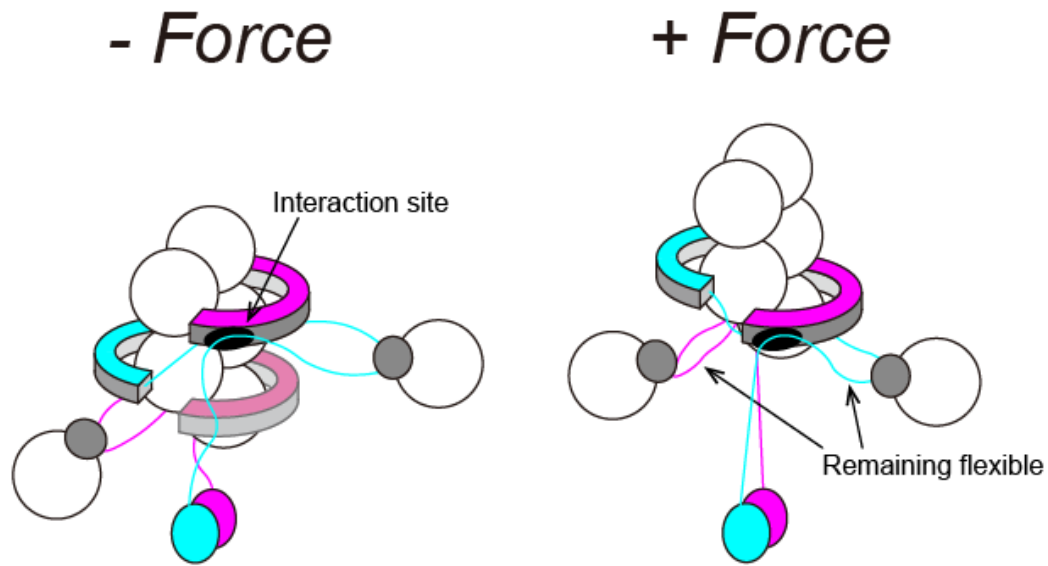

**Figure S4** Possible structural change of FH1 domain by stretching tension. As proposed by Jégou et al. (10), one of the polyproline helices in the FH1 domain possibly interacts with alpha helices in the FH2 domain (shown as “Interaction site”). Six or 14 polyproline tracks are located at the FH1 domain of mDia1 (11). If the interaction remains under tension, stretching tension is transmitted directly from the GST dimer to the FH2 domain without affecting the flexibility of the FH1 structure, including other polyproline helices that bind profilin-actin complexes. This geometry allows the capture and delivery system to work under tension.

## **Captions for Movies**

**Movie 1. Fluorescent images of elongation of the actin filament from the mDial bead.** The stage of the microscope was horizontally moved upward in the image while the mDial bead (the lower one) remained trapped. The object moving upward was the fragment of a fluorescently labeled short actin filament. The unlabeled actin filament bridged it with the mDial bead and elongates with time. The scale bar is 2  $\mu\text{m}$ .

**Movie 2. Phase contrast images of elongation of the bead-to-bead distance due to actin polymerization (0.2  $\mu\text{M}$  ATP-G-actin).** In each movie, phase contrast images of beads are shown on the left side, while the center of the lower bead calculated by means of the PTA plug-in in ImageJ software is shown on the right side. Movement of beads during the single-trap experiment is shown as green tracks, while that during the double-trap experiment (3.5–5.5 pN, measured by means of the displacement of the upper beads) is shown as red tracks. The difference between the starting points of single-trap and double-trap experiments ( $\sim 1 \mu\text{m}$ ) can be attributed to the rotation of the bead due to a difference in the tensile force (Dupuis et al., 1997). The scale bar is 2  $\mu\text{m}$ .

**Movie 3. Phase contrast images of elongation of the bead-to-bead distance due to actin polymerization (3  $\mu\text{M}$  ADP-G-actin).** For color codes of tracks, see the legend to **Movie 2**. The scale bar is 2  $\mu\text{m}$ .

**Movie 4. Phase contrast images of elongation of the bead-to-bead distance due to actin polymerization (0.2  $\mu\text{M}$  ATP-G-actin + 6  $\mu\text{M}$  profilin).** For color codes of tracks, see the legend to **Movie 2**. The scale bar is 2  $\mu\text{m}$ .

**Movie 5. Phase contrast images of elongation of the bead-to-bead distance due to actin polymerization (3  $\mu\text{M}$  ADP-G-actin + 3  $\mu\text{M}$  profilin).** For color codes of tracks, see the legend to **Movie 2**. The scale bar is 2  $\mu\text{m}$ .
